# Supplementary material for: Spatiotemporal proteomic atlas of multiple brain regions across early fetal to neonatal stages in cynomolgus monkey
Source: PubMed Central journal article supplement (PMC10317979; doi:10.1038/s41467-023-39411-7), 2023-07-03
Supplement: 41467_2023_39411_MOESM1_ESM.pdf [file 41467_2023_39411_MOESM1_ESM.pdf]

**Supplemental materials for**  
**Spatiotemporal proteomic atlas of multiple brain regions across**  
**early fetal to neonatal stages in cynomolgus monkey**

Jingkuan Wei<sup>1,2,#</sup>, Shaoxing Dai<sup>1,2,#</sup>, Yaping Yan<sup>1,2,#</sup>, Shulin Li<sup>1</sup>, Pengpeng Yang<sup>1</sup>, Ran Zhu<sup>1</sup>,  
Tianzhuang Huang<sup>1,2</sup>, Xi Li<sup>1,2</sup>, Yanchao Duan<sup>1,2</sup>, Zhengbo Wang<sup>1,2,\*</sup>, Weizhi Ji<sup>1,2,3,\*</sup>, Wei Si<sup>1,2,3,\*</sup>

<sup>1</sup>State Key Laboratory of Primate Biomedical Research; Institute of Primate Translational  
Medicine, Kunming University of Science and Technology, Kunming, Yunnan, 650500, China

<sup>2</sup>Yunnan Key Laboratory of Primate Biomedical Research, Kunming, Yunnan, 650500, China

<sup>3</sup>Chinese Primate Biomedical Research Alliance (CPBRA)

# These authors contributed equally to this work.

\*Correspondence: wangzb@lpbr.cn (Z. Wang), wji@lpbr.cn (W. Ji), siw@lpbr.cn (W. Si)

**The supplemental materials include:**

**Supplementary Figure 1.** Determination of the embryonic days and detection of embryonic development by ultrasound. Determination of the embryonic days and detection of embryonic development by ultrasound.

**Supplementary Figure 2.** Enrichment analysis of the stage-specific marker proteins in Figure 2E.

**Supplementary Figure 3.** Comparison of biological processes enriched by CB marker proteins at the four stages (Related to Figure 3C).

**Supplementary Figure 4.** The dynamic changes of proteins associated with medulloblastomas in cerebellum at the four developmental stages.

**Supplementary Figure 5.** Protein expression and KEGG pathway enrichment of Mfuzz clusters

**Supplementary Figure 6.** Heatmap showing Pearson correlations among the five brain regions for each protein in the top 6-10 abundant protein families under the three pairwise comparisons.

**Supplementary Figure 7.** Different changes of RNA and protein levels between prenatal and postnatal.

**Supplementary Figure 8.** Biological processes enriched by the 1-3 types genes in cortical (A) and subcortical regions (B).

**Supplementary Figure 9.** Biological processes enriched by the 1-3 types genes in cerebellum.

**Supplementary Figure 10.** Biological processes enriched by the 4-6 types genes in cortical (A) and subcortical regions (B)

**Supplementary Figure 11.** Biological processes enriched by the 4-6 types genes in cerebellum.

**Supplementary Table 1.** Information for the 156 samples in this study.

## Supplementary Figures

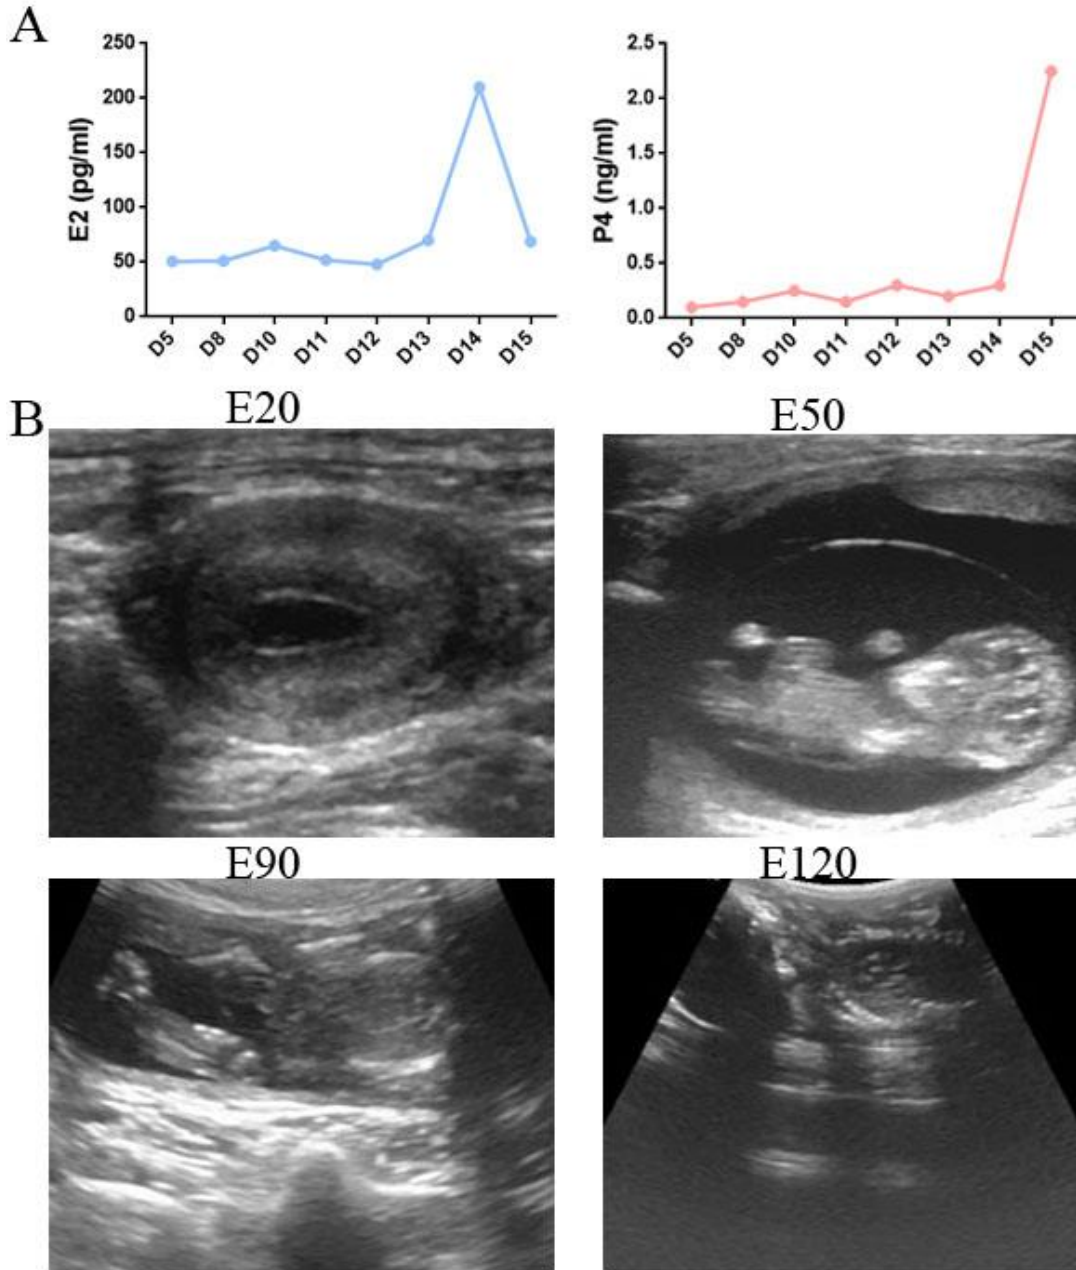

**Supplementary Figure 1. Determination of the embryonic days and detection of embryonic development by ultrasound.** (A) The ovulation time and conception time of female monkeys were determined by detecting the concentrations of estradiol (E2) and progesterone (P4) in peripheral blood. (B) Detection of embryonic development by ultrasound, including ultrasound images of 20 days post-fertilization (F20), 50 days post-fertilization (F50), 90 days post-fertilization (F90) and 120 days post-fertilization (F120).

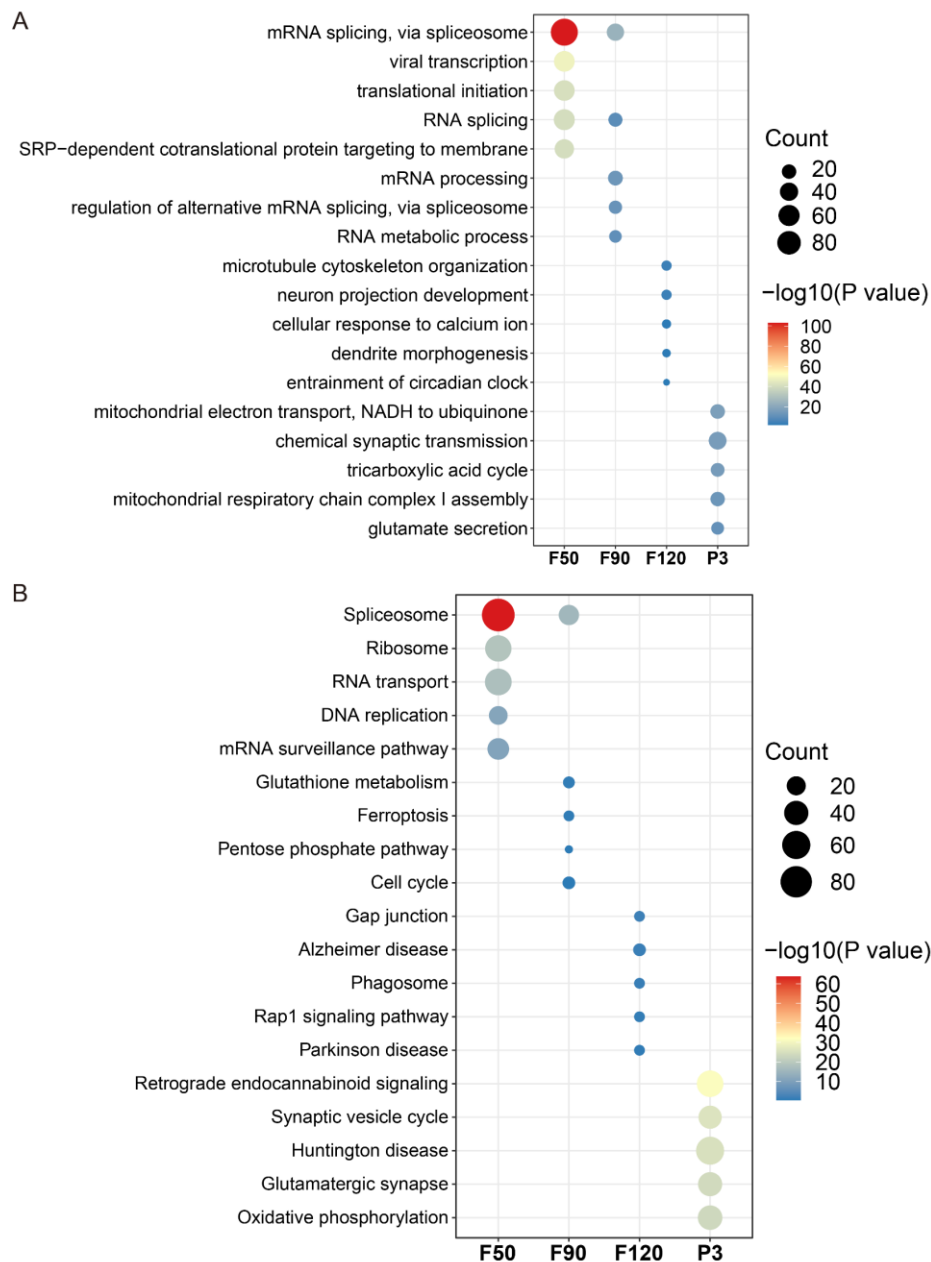

**Supplementary Figure 2. Enrichment analysis of the stage marker proteins in Figure 2E. (A)** Dotplot showing the biological processes enriched by the stage marker proteins in the indicated stages. **(B)** Dotplot showing the KEGG pathways enriched by the stage marker proteins in the indicated stages. The color shade and dot size indicate the P value and the number of genes, respectively. The P values were calculated by two-sided Fisher's exact test. Source data are provided as a Source Data file.

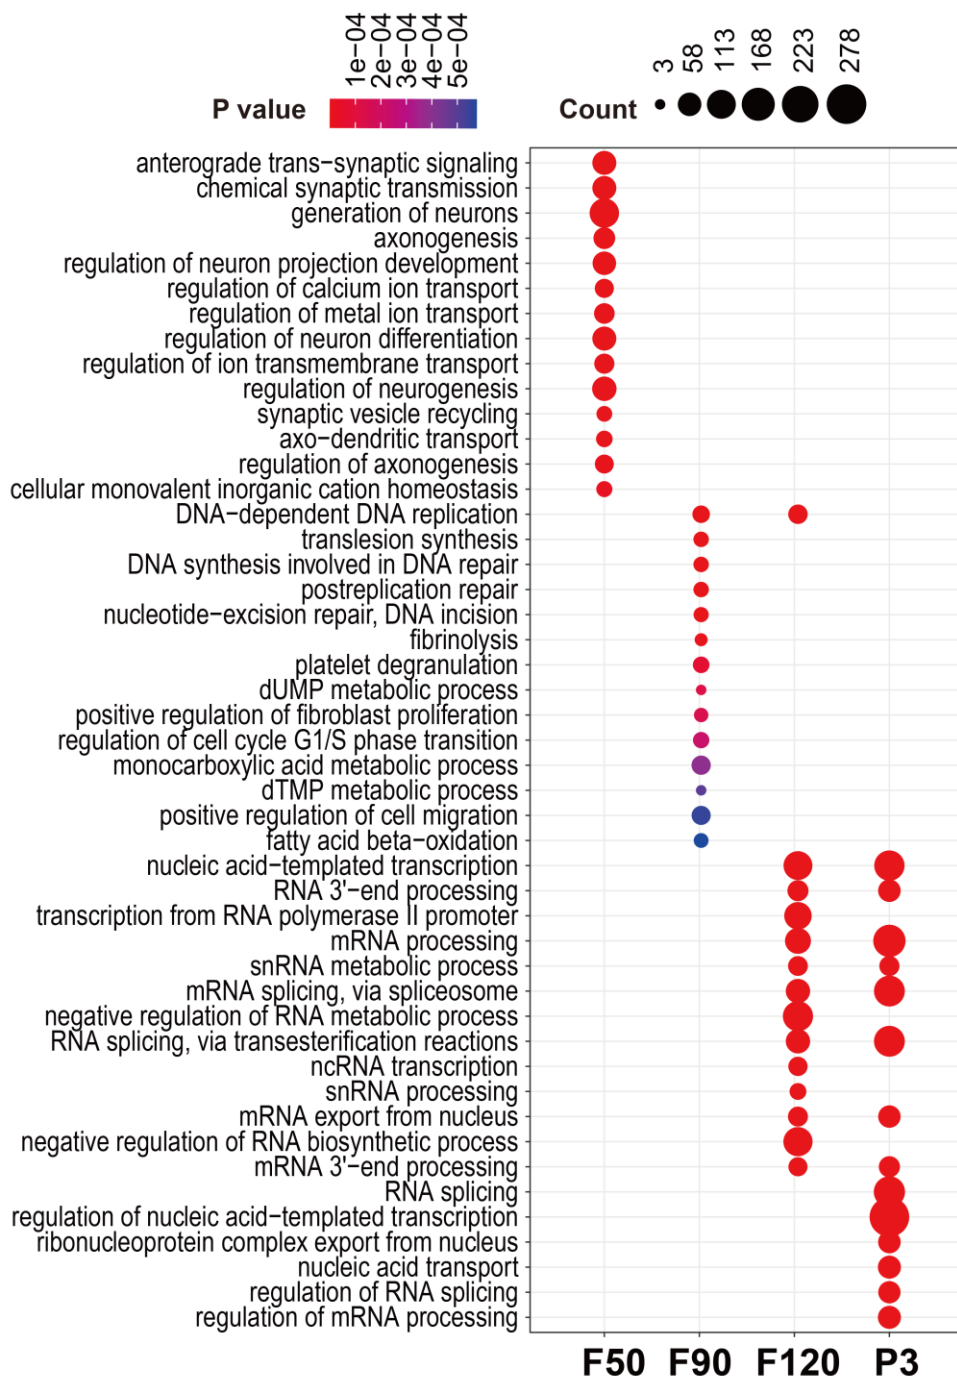

**Supplementary Figure 3. Comparison of biological processes enriched by CB marker proteins at the four stages (Related to Figure 3C).** The color shade and dot size indicate the P value and the number of genes, respectively. The P values were calculated by two-sided Fisher's exact test. Source data are provided as a Source Data file.

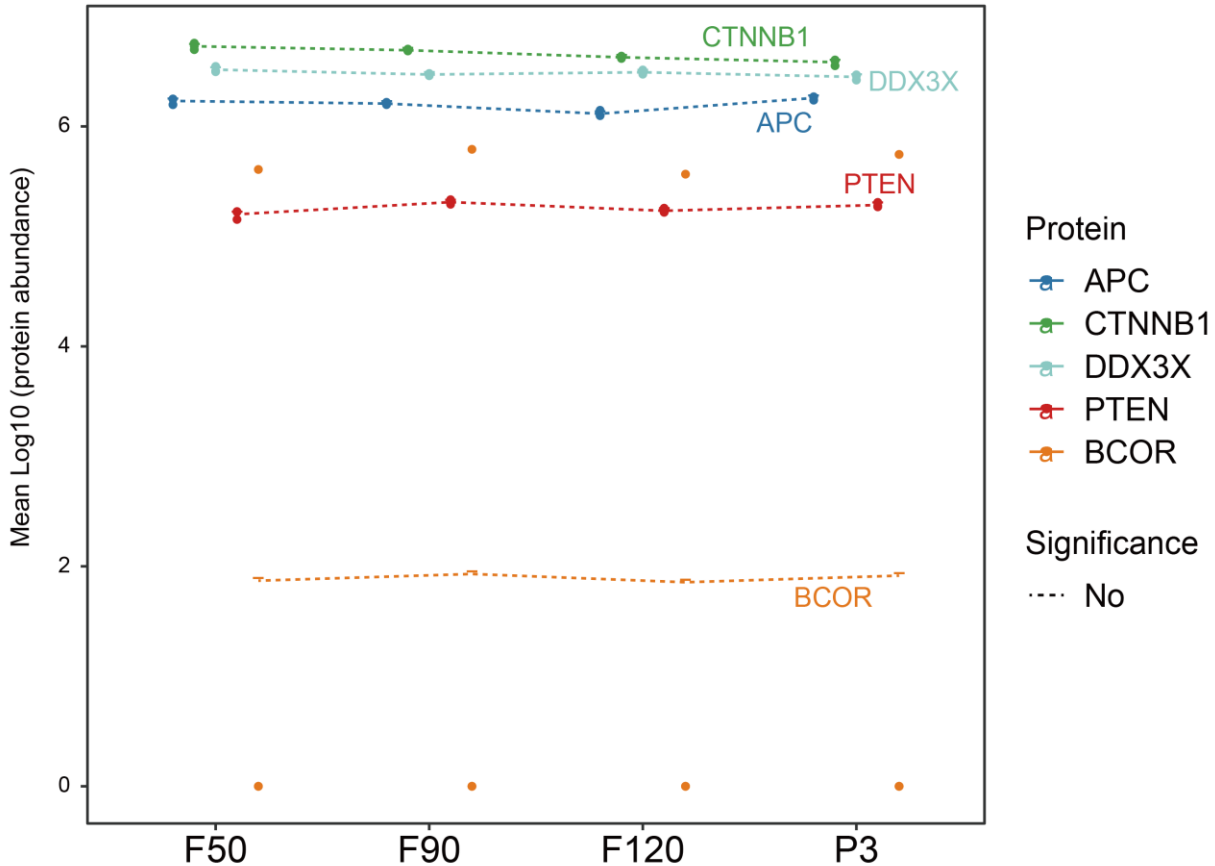

**Supplementary Figure 4. The dynamic changes of proteins associated with medulloblastomas in cerebellum at the four developmental stages.** This figure is related to Figure 3. ). The line chart showing the abundance change of proteins (APC, CTNNB1, DDX3X, PTEN, BCOR). The proteins were indicated by different colors. The dashed line indicates no significant difference between any two adjacent stages. The solid line indicates that there is at least one significant difference between two adjacent stages. The P values were calculated by two-sided student's t-test. Source data are provided as a Source Data file.

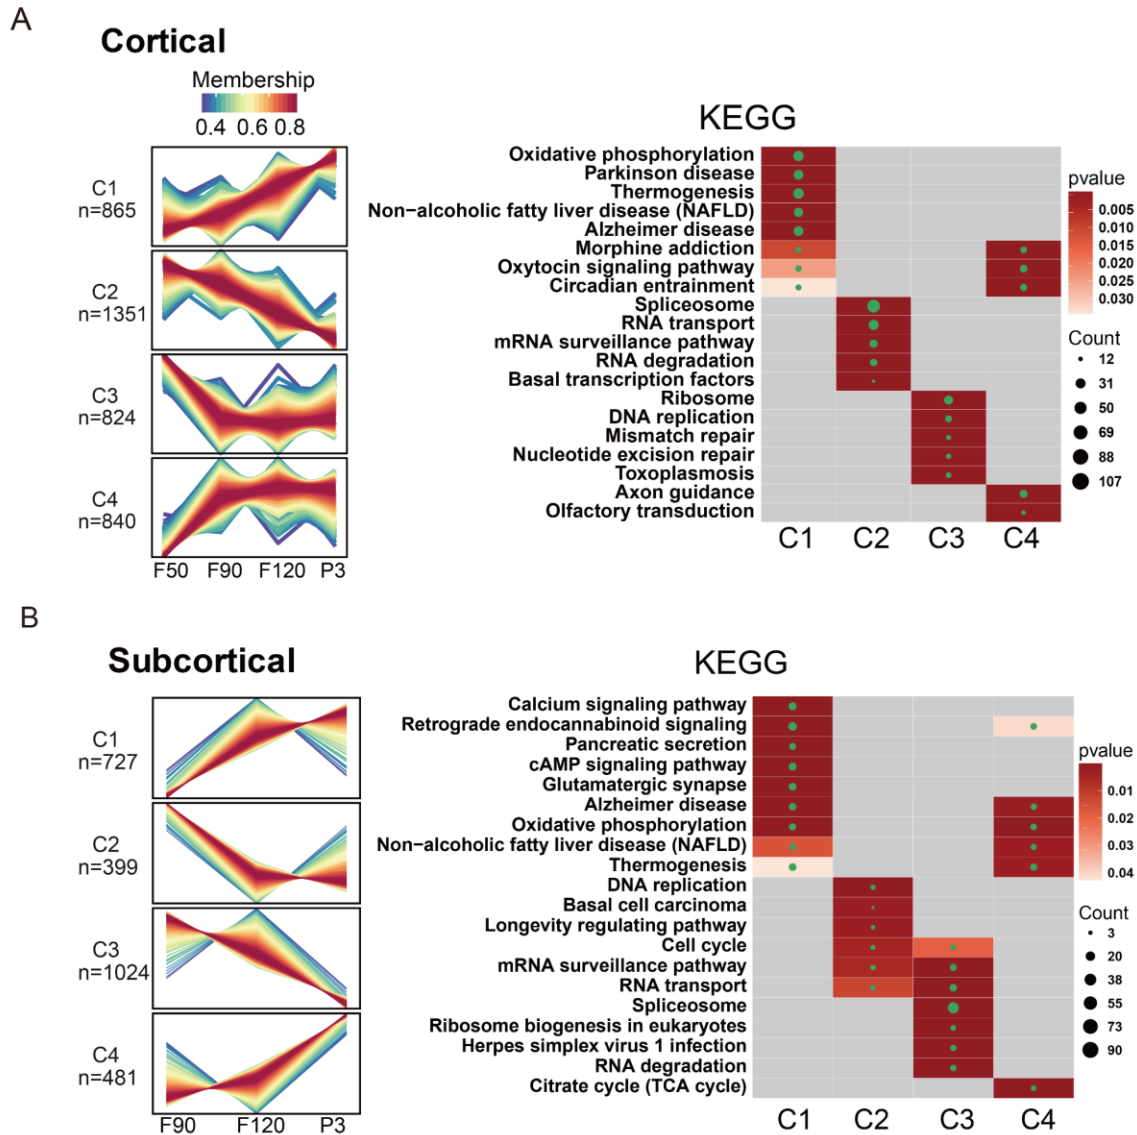

**Supplementary Figure 5. Protein expression and KEGG pathway enrichment of Mfuzz**

**clusters.** Mfuzz analysis determined four clusters of proteins across the four stages in cortical and subcortical regions, respectively. The protein expression pattern of four clusters across the four stages in cortical (A) and subcortical region (B) were shown. The KEGG pathways enriched by proteins in the four clusters were shown by Dotplot. The membership with color varying from blue to red represents the suitable degree of proteins with the change trend of the cluster. The P values were calculated by two-sided Fisher's exact test (A, B). Source data are provided as a Source Data file.





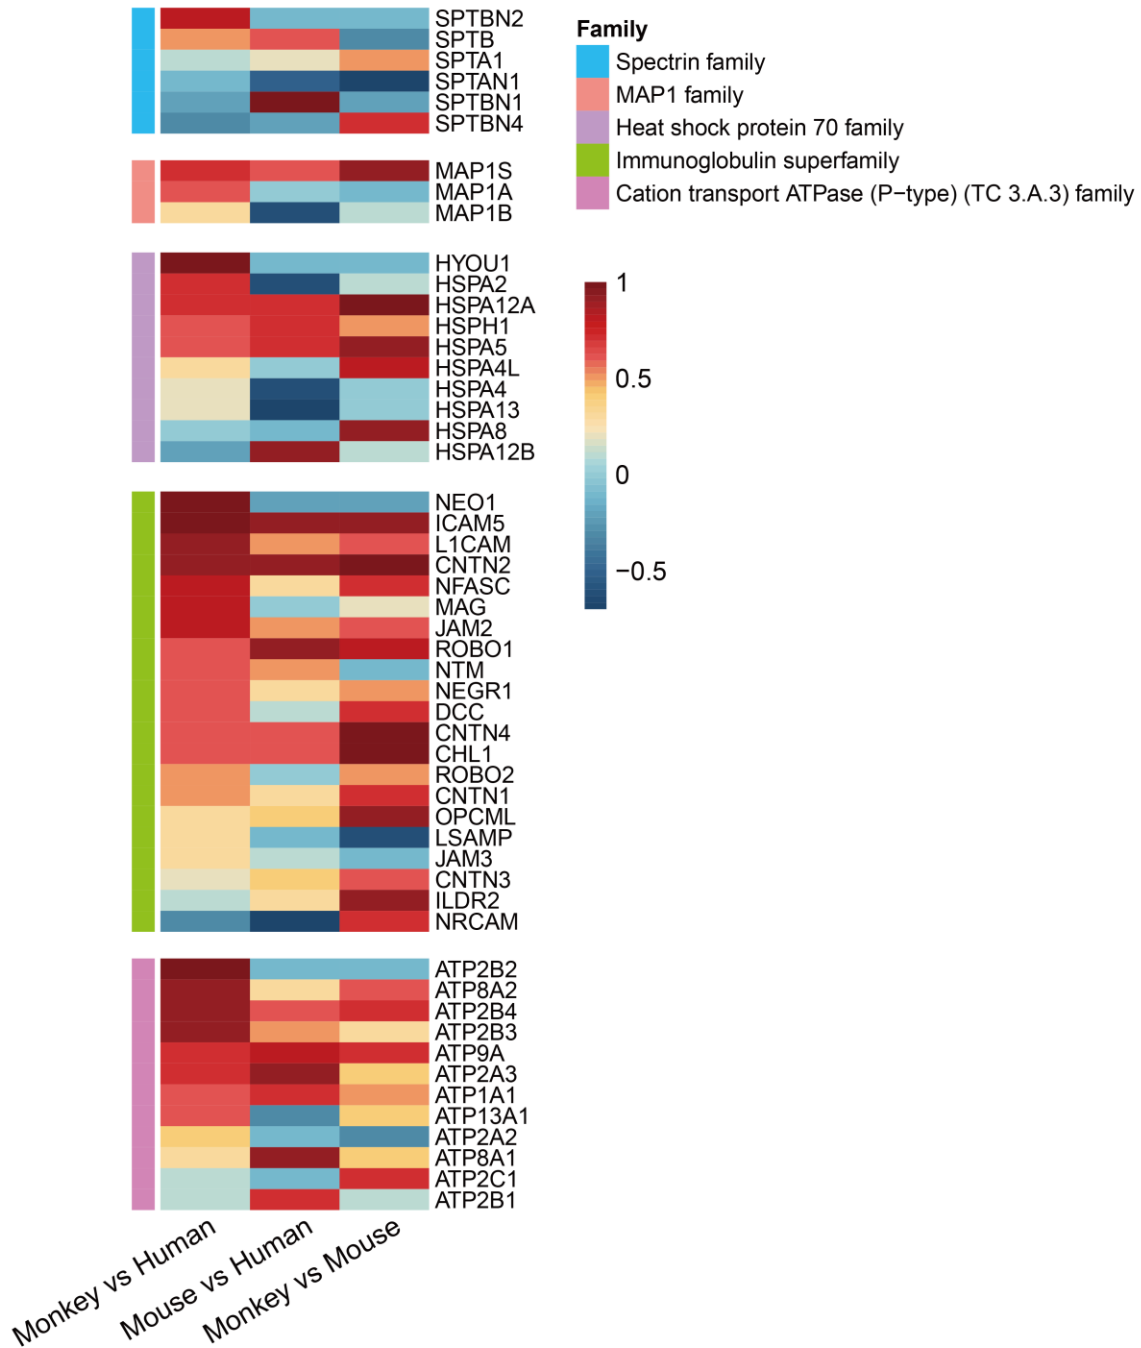

**Supplementary Figure 6. Heatmap showing Pearson correlations among the five brain regions for each protein in the top 6-10 abundant protein families under the three pairwise comparisons.** The color shade indicates the Pearson correlations. Source data are provided as a Source Data file.

A

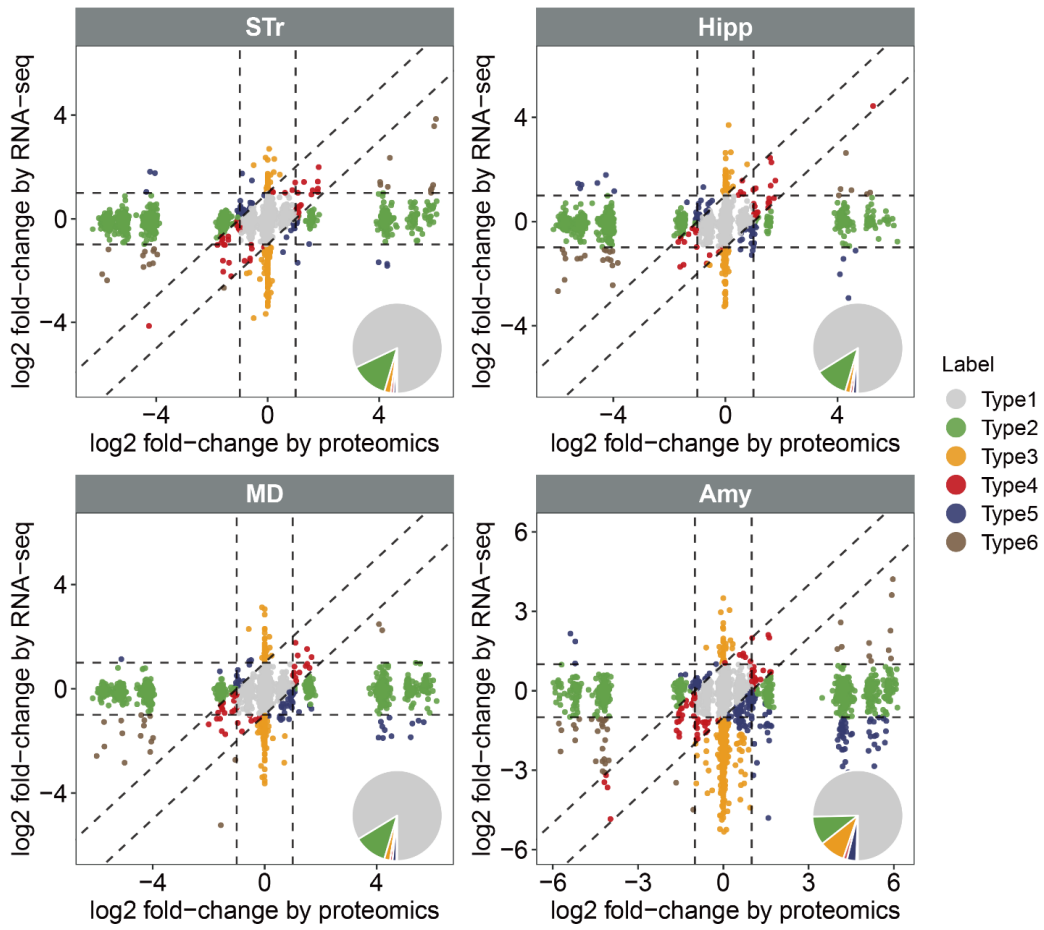

B

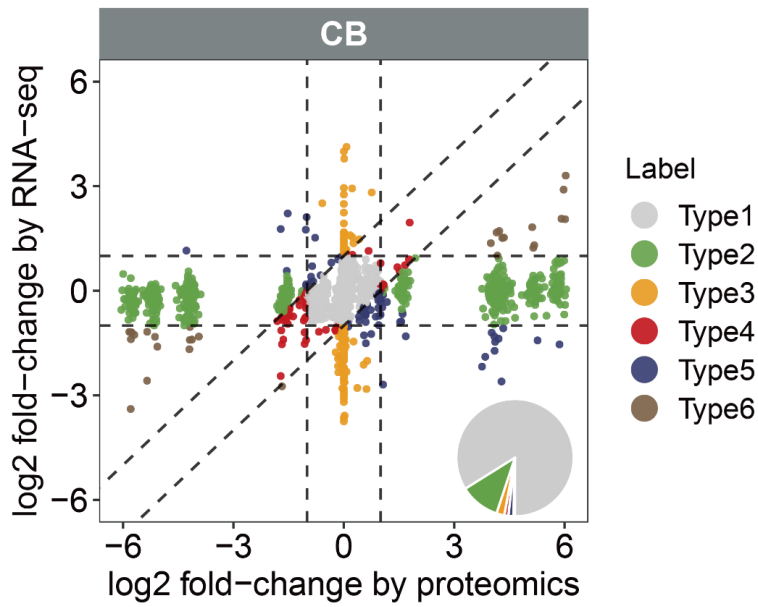

**Supplementary Figure 7. Different changes of RNA and protein levels between prenatal and postnatal.** The scatter plot showing the fold changes (FC) between prenatal and postnatal for the RNA-seq and proteomics in subcortical regions (**A**) and cerebellum (**B**). Based on FC of RNA and protein levels, all genes can be divided into 6 types as defined in the section of Methods. The 6 types genes were indicated by different colors. Inset pie charts illustrate the relative percentages of the 6 types genes. CB, cerebellum; STr, striatum; Hipp, hippocampus; MD, medial dorsal nucleus of thalamus; Amy, amygdala. Source data are provided as a Source Data file.

A

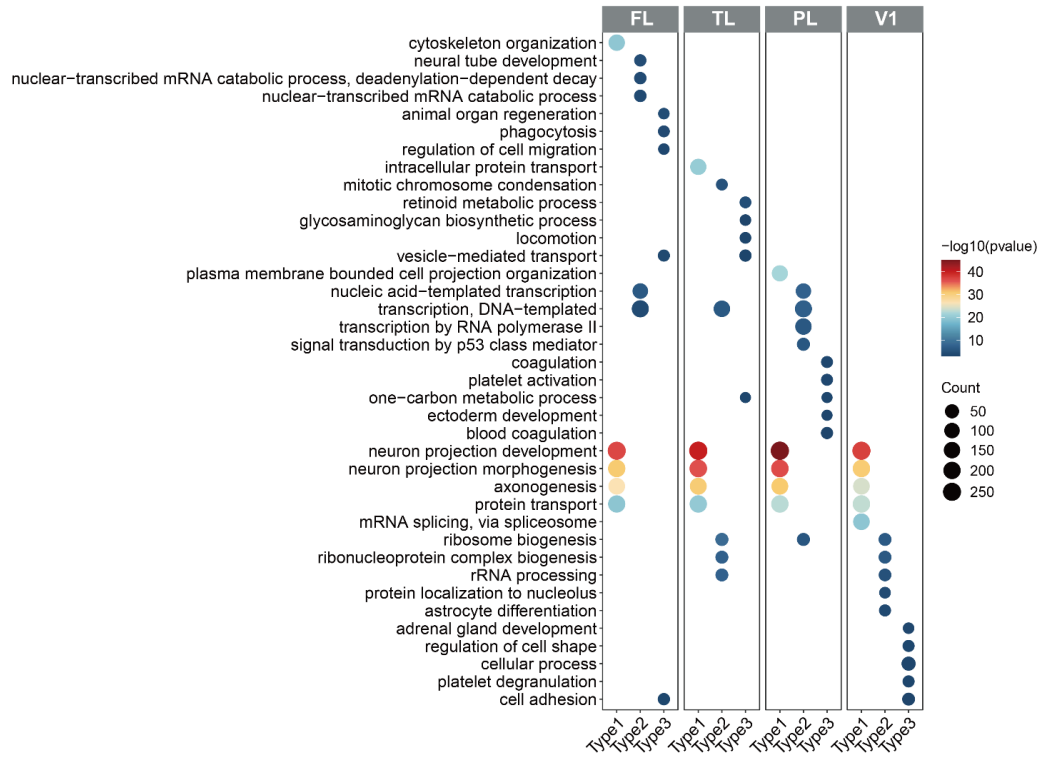

B

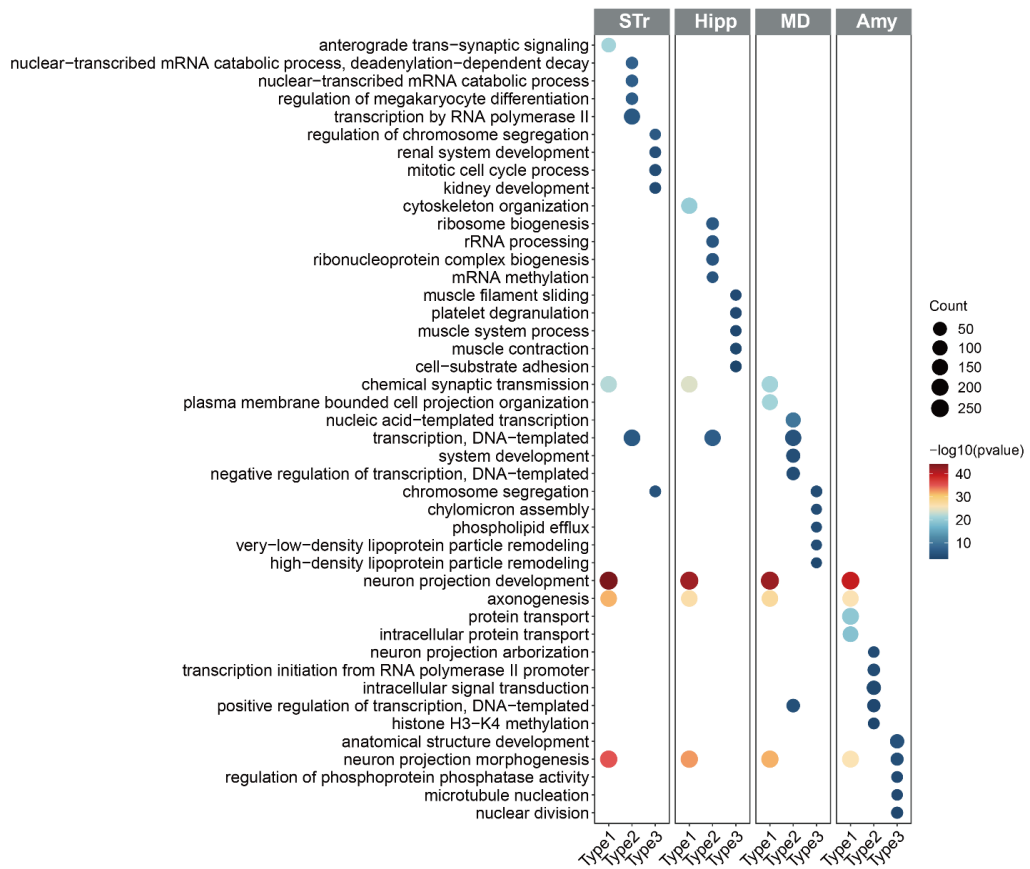

**Supplementary Figure 8. Biological processes enriched by the 1-3 types genes in cortical (A) and subcortical regions (B).** The color shade and dot size indicate the P value and the number of genes, respectively. The P values were calculated by two-sided Fisher's exact test (A, B).

Source data are provided as a Source Data file.

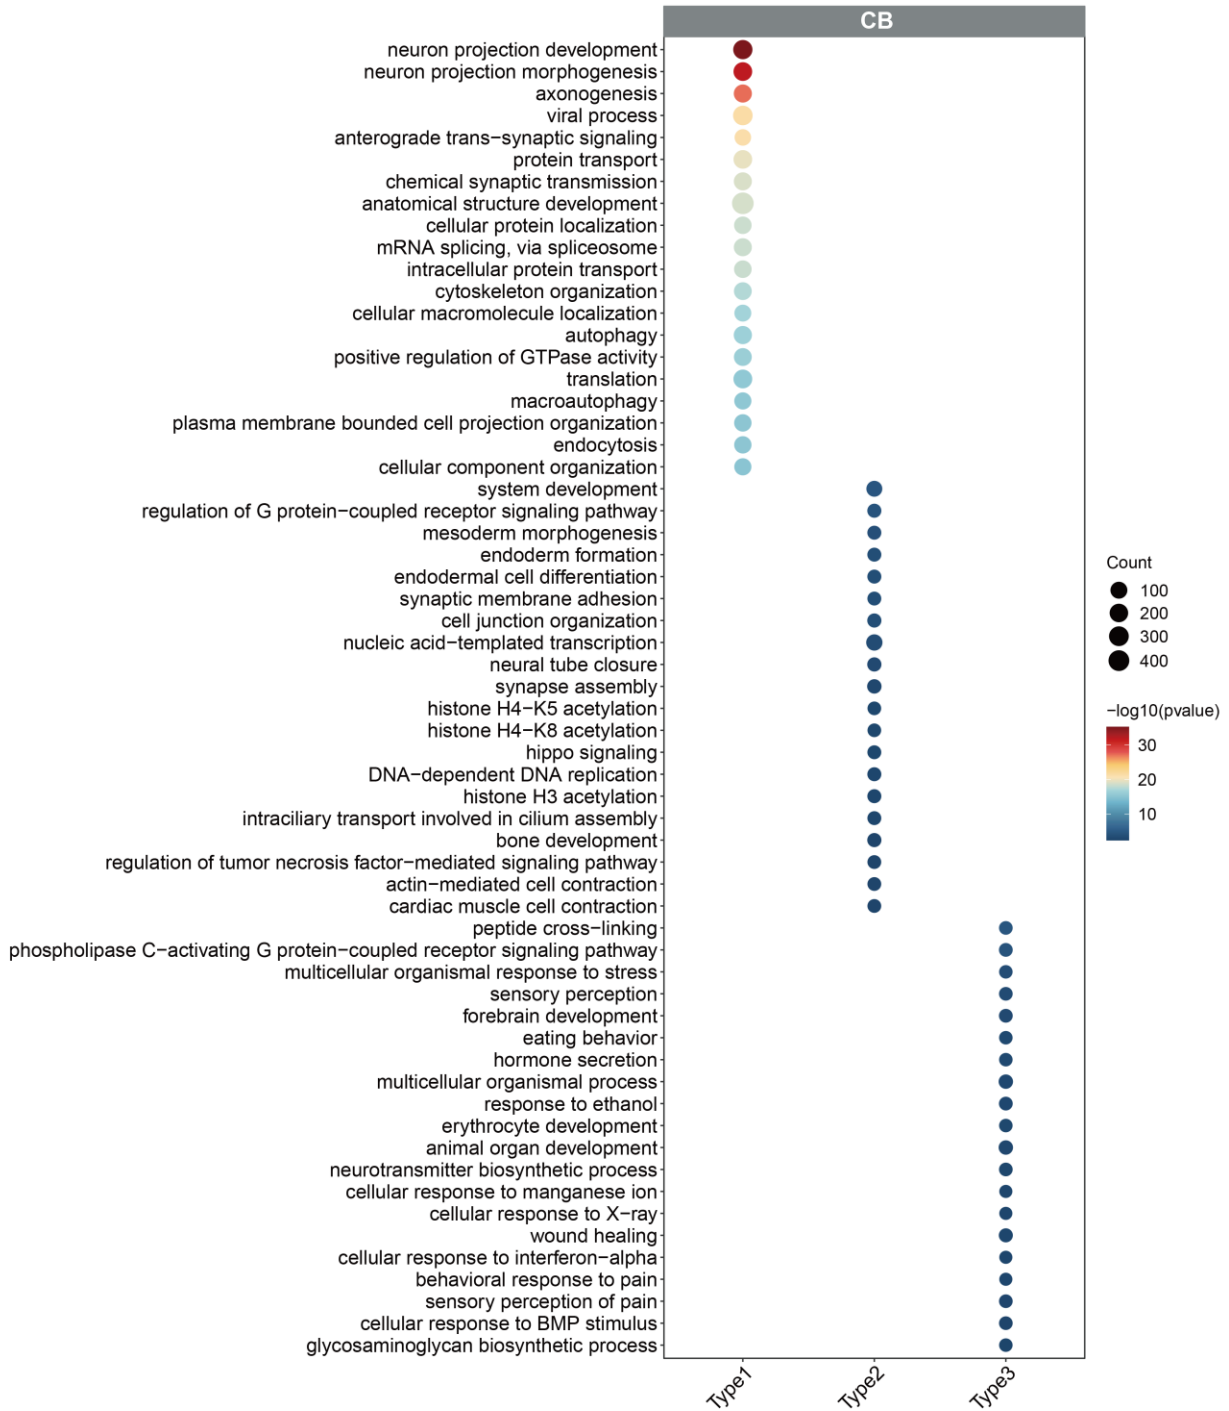

**Supplementary Figure 9. Biological processes enriched by the 1-3 types genes in cerebellum.** The color shade and dot size indicate the P value and the number of genes, respectively. The P values were calculated by two-sided Fisher's exact test. Source data are provided as a Source Data file.

A

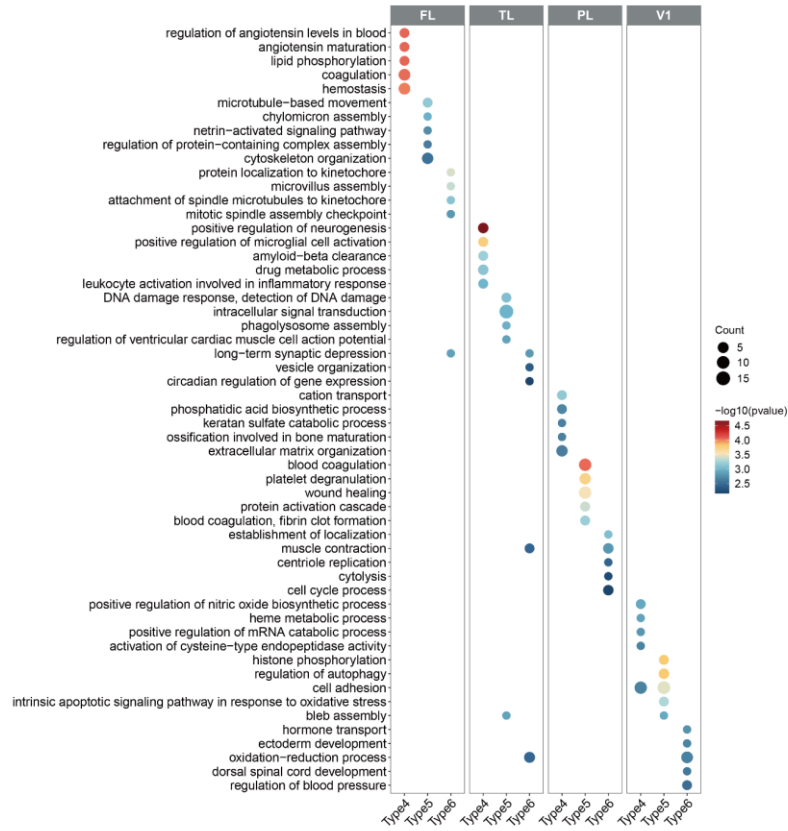

B

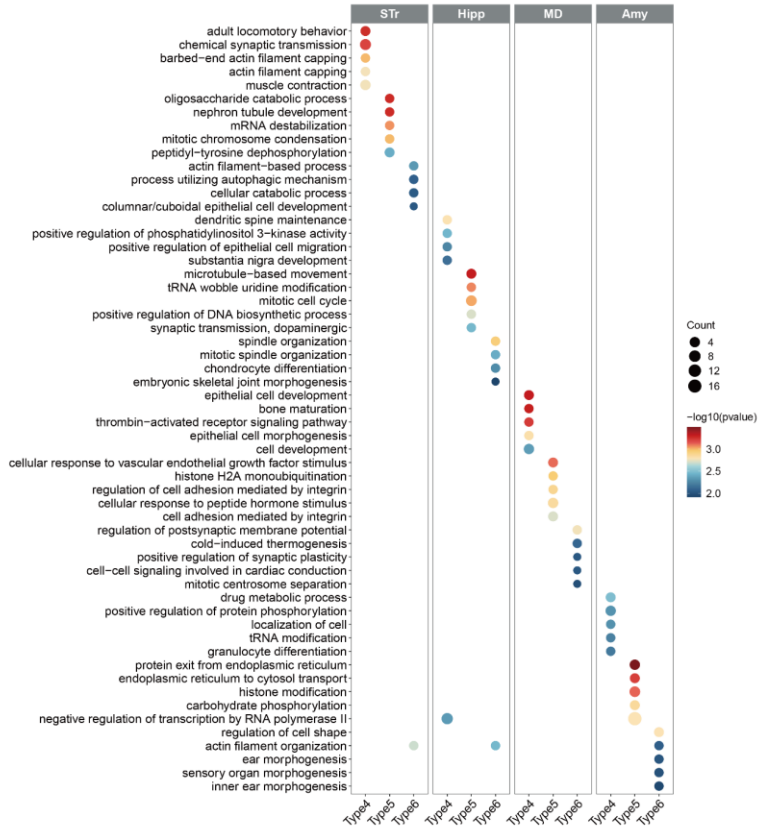

**Supplementary Figure 10. Biological processes enriched by the 4-6 types genes in cortical (A) and subcortical regions (B).** The color shade and dot size indicate the P value and the number of genes, respectively. The P values were calculated by two-sided Fisher's exact test (A, B). Source data are provided as a Source Data file.



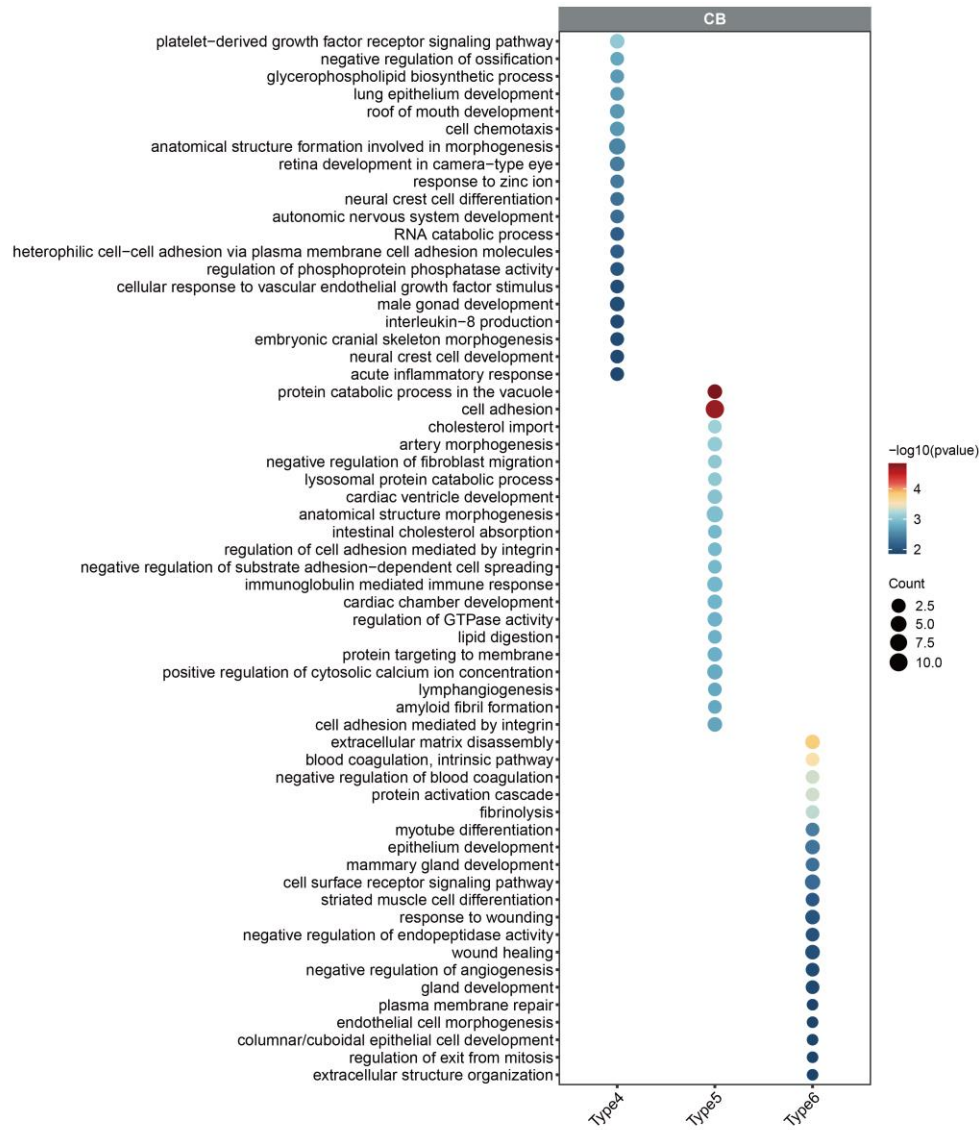

**Supplementary Fig. 11. Biological processes enriched by the 4-6 types genes in cerebellum.** The color shade and dot size indicate the P value and the number of genes, respectively. The P values were calculated by two-sided Fisher's exact test. Source data are provided as a Source Data file.

**Supplementary Table 1. Information for the 156 samples in this study.**

| <i>Animal code</i> | <i>Days post-fertilization</i> | <i>Sex</i> | <i>Brain regions</i>                                                                   | <i>Notes</i>   |
|--------------------|--------------------------------|------------|----------------------------------------------------------------------------------------|----------------|
| F50-1              | 50                             | M          | PFC (FL), TL, PL, V1, CB                                                               | CS             |
| F50-2              | 50                             | M          | PFC (FL), TL, PL, V1, CB                                                               | CS             |
| F50-3              | 50                             | M          | PFC (FL), TL, PL, V1, CB                                                               | CS             |
| F90-1              | 90                             | F          | aPFC, pPFC, IC, M1, TL, PL, V1, CB, STr, Hipp, Amy                                     | CS             |
| F90-2              | 90                             | F          | aPFC, pPFC, IC, M1, TL, PL, V1, CB, STr, Hipp, Amy                                     | CS             |
| F90-3              | 90                             | F          | aPFC, pPFC, IC, M1, TL, PL, V1, CB, STr, Hipp, Amy                                     | CS             |
| F120-1             | 120                            | F          | sPFG, mPFG, iPFG, OFC, IC, M1, aCG, sTG, mTG, iTG, S1, sPL, V1, CB, STr, Hipp, MD, Amy | CS             |
| F120-2             | 120                            | M          | sPFG, mPFG, iPFG, OFC, IC, M1, aCG, sTG, mTG, iTG, S1, sPL, V1, CB, STr, Hipp, MD, Amy | CS             |
| F120-3             | 120                            | F          | sPFG, mPFG, iPFG, OFC, IC, M1, aCG, sTG, mTG, iTG, S1, sPL, V1, CB, STr, Hipp, MD, Amy | CS             |
| P3-1               | 150+3                          | F          | sPFG, mPFG, iPFG, OFC, IC, M1, aCG, sTG, mTG, iTG, S1, sPL, V1, CB, STr, Hipp, MD, Amy | Born naturally |
| P3-2               | 150+3                          | F          | sPFG, mPFG, iPFG, OFC, IC, M1, aCG, sTG, mTG, iTG, S1, sPL, V1, CB, STr, Hipp, MD, Amy | Born naturally |
| P3-3               | 150+3                          | M          | sPFG, mPFG, iPFG, OFC, IC, M1, aCG, sTG, mTG, iTG, S1, sPL, V1, CB, STr, Hipp, MD, Amy | Born naturally |

F50, F90 and 120 means 50-, 90- and 120- days post fertilization, P3 means 3 days post birth.

PFC (FL): prefrontal cortex (frontal lobe), TL: temporal lobe, PL: parietal lobe, V1: primary visual cortex (occipital lobe), CB: cerebellum, aPFC: anterior prefrontal cortex, pPFC: posterior prefrontal cortex, IC: insular cortex, M1: primary motor cortex, STr: striatum, Hipp: hippocampus, sPFG: superior frontal gyrus, mPFG: middle frontal gyrus, iPFG: inferior frontal gyrus, OFC: orbital frontal cortex, aCG: anterior cingulate gyrus, sTG: superior temporal gyrus, mTG: middle temporal gyrus, iTG: inferior temporal gyrus, S1: primary somatosensory cortex, sPL: superior parietal lobule, MD: mediodorsal nucleus of the thalamus, Amy: amygdala. CS: caesarean section.
