# Supplementary material for: Spatiotemporal proteomic atlas of multiple brain regions across early fetal to neonatal stages in cynomolgus monkey
Source: PubMed Central journal article supplement (PMC10317979; doi:10.1038/s41467-023-39411-7), 2023-07-03
Supplement: 41467_2023_39411_MOESM3_ESM.pdf [file 41467_2023_39411_MOESM3_ESM.pdf]

## **Description of Additional Supplementary Files**

**Supplementary Data 1.** Protein expression of all samples.

**Supplementary Data 2.** Statistics of the identified protein in each stage and each region.

**Supplementary Data 3.** The percentage of subcellular localizations in different brain regions and stages.

**Supplementary Data 4.** The percentage of protein families in different brain regions and stages.

**Supplementary Data 5.** The stage-specific marker proteins (not including cerebellum) for each stage.

**Supplementary Data 6.** The cerebellum marker proteins over the four stages. The P values were calculated by two-sided student's t-test test.

**Supplementary Data 7.** The marker proteins in cortical or subcortical region over the four stages.

**Supplementary Data 8.** The biological processes enriched by region-specific marker proteins over the four stages. The P values were calculated by two-sided Fisher's exact test without adjustments.

**Supplementary Data 9.** The biological processes enriched by the 6 types genes in cortical regions, subcortical regions and cerebellum. The P values were calculated by two-sided Fisher's exact test.

**Supplementary Data 10.** Raw results for the identification and quantification of all peptides and proteins.
